# Supplementary material for: Relationship between Professional Training of Dentists and Outpatient Clinical Production
Source: Biomed Res Int. 2022 Mar 20;2022:5365363. doi: 10.1155/2022/5365363 (PMC8958072; doi:10.1155/2022/5365363)
Supplement: Supplementary Materials — The supplemental file contains the codes of procedures that were grouped into each analytical category. [file 5365363.f1.pdf]

Supplementary table

Classification of procedures approved in SIA-SUS performed by Dental Surgeons, following the Brazilian Classification of Occupations - CBO2002.  
(Codes: "223204", "223208", "223280", "223284", "223212", "223216", "223220", "223224", "223228", "223276", "223288", "223232", "223236", "223240", "223244", "223248", "223252", "223256", "223260", "223264", "223268", "223272", "2232B1", "223293")

| Classification                                                                        |                                     |
|---------------------------------------------------------------------------------------|-------------------------------------|
| Clinical Procedures                                                                   | Absolute and Relative Frequency (%) |
| Operative Dentistry                                                                   | 15.034.170 (16,47)                  |
| RESTAURAÇÃO DE DENTE PERMANENTE POSTERIOR                                             | 8.000.957 (53,22)                   |
| RESTAURAÇÃO DE DENTE PERMANENTE ANTERIOR COM RESINA COMPOSTA                          | 3.069.837 (20,42)                   |
| RESTAURAÇÃO DE DENTE DECÍDUO                                                          | 2.055.461 (13,67)                   |
| CAPEAMENTO PULPAR                                                                     | 1.897.271 (12,62)                   |
| TRATAMENTO DE NEURALGIAS FACIAIS                                                      | 10.644 (0,07)                       |
| Periodontics                                                                          | 12.677.762 (13,89)                  |
| RASPAGEM ALISAMENTO E POLIMENTO SUPRAGENGIVAIS (POR SEXTANTE)                         | 9.268.243 (73,11)                   |
| RASPAGEM ALISAMENTO SUBGENGIVAIS (POR SEXTANTE)                                       | 3.104.752 (24,49)                   |
| RASPAGEM CORONO-RADICULAR (POR SEXTANTE)                                              | 286.636 (2,26)                      |
| GENGIVECTOMIA (POR SEXTANTE)                                                          | 7.146 (0,06)                        |
| ODONTOSECÇÃO / RADILECTOMIA / TUNELIZAÇÃO                                             | 5.481 (0,04)                        |
| TRATAMENTO CIRÚRGICO PERIODONTAL (POR SEXTANTE)                                       | 3.187 (0,03)                        |
| GENGIVOPLASTIA (POR SEXTANTE)                                                         | 1.916 (0,02)                        |
| ENXERTO GENGIVAL                                                                      | 401 (0,00)                          |
| Oral Surgery                                                                          | 5.494.875 (6,02)                    |
| EXODONTIA DE DENTE PERMANENTE                                                         | 2.427.775 (44,18)                   |
| EXODONTIA DE DENTE DECÍDUO                                                            | 1.479.260 (26,92)                   |
| EXCISÃO E/OU SUTURA SIMPLES DE PEQUENAS LESÕES / FERIMENTOS DE PELE / ANEXOS E MUCOSA | 594.750 (10,82)                     |
| TRATAMENTO CIRÚRGICO DE HEMORRAGIA BUCO-DENTAL                                        | 344.887 (6,28)                      |
| ULOTOMIA/ULECTOMIA                                                                    | 341.507 (6,22)                      |
| TRATAMENTO DE ALVEOLITE                                                               | 149.833 (2,73)                      |
| DRENAGEM DE ABSCESSO                                                                  | 76.210 (1,39)                       |
| CURETAGEM PERIAPICAL                                                                  | 28.316 (0,52)                       |
| EXODONTIA MÚLTIPLA COM ALVEOLOPLASTIA POR SEXTANTE                                    | 10.534 (0,19)                       |
| EXCISÃO E SUTURA DE LESÃO NA BOCA                                                     | 8.857 (0,16)                        |
| REMOÇÃO DE DENTE RETIDO (INCLUSO / IMPACTADO)                                         | 8.276 (0,15)                        |
| FRENÉCTOMIA                                                                           | 5.825 (0,11)                        |
| GLOSSORRAFIA                                                                          | 5.146 (0,09)                        |
| DRENAGEM DE ABSCESSO DA BOCA E ANEXOS                                                 | 4.276 (0,08)                        |
| EXCISAO DE LESAO E/OU SUTURA DE FERIMENTO DA PELE ANEXOS E MUCOSA                     | 3.575 (0,07)                        |
| CORREÇÃO DE IRREGULARIDADES DE REBORDO ALVEOLAR                                       | 2.283 (0,04)                        |
| REMOÇÃO DE TORUS E EXOSTOSES                                                          | 1.151 (0,02)                        |
| RETIRADA DE MATERIAL DE SÍNTESE ÓSSEA / DENTÁRIA                                      | 668 (0,01)                          |
| APROFUNDAMENTO DE VESTÍBULO ORAL (POR SEXTANTE)                                       | 302 (0,01)                          |
| CORREÇÃO DE BRIDAS MUSCULARES                                                         | 287 (0,01)                          |
| MARSUPIALIZAÇÃO DE CISTOS E PSEUDOCISTOS                                              | 253 (0,00)                          |
| REIMPLANTE E TRANSPLANTE DENTAL (POR ELEMENTO)                                        | 205 (0,00)                          |
| CONTENÇÃO DE DENTES POR SPLINTAGEM                                                    | 120 (0,00)                          |
| BIÓPSIA DOS TECIDOS MOLES DA BOCA                                                     | 109 (0,00)                          |
| EXERESE DE TUMOR DE PELE E ANEXOS / CISTO SEBACEO / LIPOMA                            | 91 (0,00)                           |
| ENXERTO ÓSSEO DE ÁREA DOADORA INTRABUCAL                                              | 90 (0,00)                           |
| EXERESE DE CISTO ODONTOGÊNICO E NÃO-ODONTOGÊNICO                                      | 76 (0,00)                           |
| CORREÇÃO DE TUBEROSIDADE DO MAXILAR                                                   | 70 (0,00)                           |
| EXCISÃO DE CÁLCULO DE GLÂNDULA SALIVAR                                                | 37 (0,00)                           |
| OSTEOTOMIA DAS FRATURAS ALVEOLO-DENTÁRIAS                                             | 20 (0,00)                           |
| TRATAMENTO CIRÚRGICO DE FÍSTULA INTRA / EXTRAORAL                                     | 19 (0,00)                           |
| APICECTOMIA COM OU SEM OBTURAÇÃO RETRÓGRADA                                           | 16 (0,00)                           |
| INCISAO E DRENAGEM DE ABSCESSO                                                        | 16 (0,00)                           |
| RECONSTRUÇÃO PARCIAL DO LÁBIO TRAUMATIZADO                                            | 13 (0,00)                           |
| REDUÇÃO DE FRATURA ALVEOLO-DENTÁRIA SEM OSTEOSSÍNTESE                                 | 5 (0,00)                            |
| TRATAMENTO CIRÚRGICO PARA TRACIONAMENTO DENTAL                                        | 5 (0,00)                            |
| REDUÇÃO DE LUXAÇÃO TÊMPORO-MANDIBULAR                                                 | 3 (0,00)                            |
| TAMPONAMENTO NASAL ANTERIOR E/OU POSTERIOR                                            | 3 (0,00)                            |
| BIÓPSIA DE GLÂNDULA SALIVAR                                                           | 2 (0,00)                            |
| EXCISÃO DE RÂNULA OU FENÔMENO DE RETENÇÃO SALIVAR                                     | 2 (0,00)                            |
| BIÓPSIA DE OSSO DO CRÂNIO E DA FACE                                                   | 1 (0,00)                            |
| RETIRADA DE CORPO ESTRANHO DOS OSSOS DA FACE                                          | 1 (0,00)                            |
| Endodontics                                                                           | 1.872.410 (2,05)                    |
| ACESSO A POLPA DENTARIA E MEDICACAO (POR DENTE)                                       | 1.028.629 (54,94)                   |
| CURATIVO DE DEMORA C/ OU S/ PREPARO BIOMECANICO                                       | 407.808 (21,78)                     |
| PULPOTOMIA DENTÁRIA                                                                   | 344.054 (18,37)                     |
| TRATAMENTO ENDODÔNTICO DE DENTE DECÍDUO                                               | 30.385 (1,62)                       |
| TRATAMENTO ENDODÔNTICO DE DENTE PERMANENTE BIRRADICULAR                               | 16.366 (0,87)                       |
| TRATAMENTO ENDODÔNTICO DE DENTE PERMANENTE ANTERIOR                                   | 15.904 (0,85)                       |
| TRATAMENTO ENDODÔNTICO DE DENTE PERMANENTE COM TRÊS OU MAIS RAÍZES                    | 13.792 (0,74)                       |
| SELAMENTO DE PERFURAÇÃO RADICULAR                                                     | 5.650 (0,30)                        |
| RETRATAMENTO ENDODÔNTICO EM DENTE PERMANENTE BI-RADICULAR                             | 4.392 (0,23)                        |
| RETRATAMENTO ENDODÔNTICO EM DENTE PERMANENTE UNI-RADICULAR                            | 3.671 (0,20)                        |
| RETRATAMENTO ENDODÔNTICO EM DENTE PERMANENTE COM 3 OU MAIS RAÍZES                     | 1.759 (0,09)                        |
| Prosthodontics and Rehabilitation                                                     | 422.622 (0,46)                      |

|                                                                                                   |                           |
|---------------------------------------------------------------------------------------------------|---------------------------|
| AJUSTE OCLUSAL                                                                                    | 232.178 (54,94)           |
| MOLDAGEM DENTO-GENGIVAL P/ CONSTRUCAO DE PROTESE DENTARIA                                         | 81.693 (19,33)            |
| INSTALAÇÃO DE PRÓTESE DENTÁRIA                                                                    | 36.690 (8,68)             |
| ADAPTAÇÃO DE PRÓTESE DENTÁRIA                                                                     | 18.465 (4,37)             |
| PROTESE TOTAL MAXILAR                                                                             | 14.167 (3,35)             |
| PROTESE TOTAL MANDIBULAR                                                                          | 10.648 (2,52)             |
| REEMBASAMENTO E CONserto DE PROTESE DENTARIA                                                      | 7.135 (1,69)              |
| PROTESE PARCIAL MANDIBULAR REMOVIVEL                                                              | 6.990 (1,65)              |
| MANUTENCAO PERIODICA DE PROTESE BUCO-MAXILO-FACIAL                                                | 5.407 (1,28)              |
| PROTESE PARCIAL MAXILAR REMOVIVEL                                                                 | 4.980 (1,18)              |
| CIMENTAÇÃO DE PRÓTESE DENTÁRIA                                                                    | 1.864 (0,44)              |
| PROTESES CORONARIAS / INTRA-RADICULARES FIXAS / ADESIVAS (POR ELEMENTO)                           | 815 (0,19)                |
| COLOCACAO DE PLACA DE MORDIDA                                                                     | 556 (0,13)                |
| MANUTENÇÃO/CONserto DE APARELHO ORTODÔNTICO/ORTOPÉDICO                                            | 456 (0,11)                |
| COROA PROVISORIA                                                                                  | 346 (0,08)                |
| PLANO INCLINADO                                                                                   | 107 (0,03)                |
| PRÓTESE MANDIBULAR                                                                                | 38 (0,01)                 |
| PRÓTESE PARA GRANDES PERDAS MAXILARES                                                             | 30 (0,01)                 |
| PLACA OCLUSAL                                                                                     | 24 (0,01)                 |
| APARELHO ORTOPÉDICO E ORTODÔNTICO REMOVÍVEL                                                       | 19 (0,00)                 |
| PROTESE TEMPORARIA                                                                                | 14 (0,00)                 |
| <b>Diagnosis</b>                                                                                  | <b>143.131 (0,16)</b>     |
| RADIOGRAFIA PERI-APICAL INTERPROXIMAL (BITE-WING)                                                 | 139.917 (97,75)           |
| RADIOGRAFIA OCLUSAL                                                                               | 1.713 (1,20)              |
| TESTE RÁPIDO PARA SÍFILIS                                                                         | 652 (0,46)                |
| TESTE RÁPIDO PARA DETECÇÃO DE INFECÇÃO PELO HIV                                                   | 490 (0,34)                |
| RADIOGRAFIA PANORAMICA                                                                            | 193 (0,13)                |
| TRIAGEM OFTALMOLÓGICA                                                                             | 122 (0,09)                |
| TESTE RAPIDO PARA DETECCAO DE HIV NA GESTANTE OU PAI/PARCEIRO                                     | 23 (0,02)                 |
| TESTE RÁPIDO PARA SÍFILIS NA GESTANTE OU PAI/PARCEIRO                                             | 17 (0,01)                 |
| RADIOGRAFIA BILATERAL DE ORBITAS (PA + OBLIQUAS + HIRTZ)                                          | 1 (0,00)                  |
| RADIOGRAFIA DE ARTICULACAO TEMPORO-MANDIBULAR BILATERAL                                           | 1 (0,00)                  |
| RADIOGRAFIA DE MAXILAR (PA + OBLIQUA)                                                             | 1 (0,00)                  |
| TELERADIOGRAFIA COM TRACADOS E SEM TRACADOS                                                       | 1 (0,00)                  |
| <b>Oral Health Promotion and Preventive Procedures</b>                                            |                           |
| <b>Prevention</b>                                                                                 | <b>35.458.373 (38,84)</b> |
| AÇÃO COLETIVA DE ESCOVAÇÃO DENTAL SUPERVISIONADA                                                  | 12.270.598 (34,61)        |
| AÇÃO COLETIVA DE APLICAÇÃO TÓPICA DE FLÚOR GEL                                                    | 3.808.854 (10,74)         |
| AÇÃO COLETIVA DE BOCHECHO FLUORADO                                                                | 3.654.895 (10,31)         |
| APLICAÇÃO TÓPICA DE FLÚOR (INDIVIDUAL POR SESSÃO)                                                 | 3.414.241 (9,63)          |
| AÇÃO COLETIVA DE EXAME BUCAL COM FINALIDADE EPIDEMIOLOGICA                                        | 3.151.311 (8,89)          |
| SELAMENTO PROVISÓRIO DE CAVIDADE DENTÁRIA                                                         | 2.955.403 (8,33)          |
| EVIDENCIAÇÃO DE PLACA BACTERIANA                                                                  | 2.318.824 (6,54)          |
| ATIVIDADE EDUCATIVA / ORIENTAÇÃO EM GRUPO NA ATENÇÃO PRIMÁRIA                                     | 2.071.834 (5,84)          |
| APLICAÇÃO DE SELANTE (POR DENTE)                                                                  | 1.420.603 (4,01)          |
| APLICAÇÃO DE CARIOSTÁTICO (POR DENTE)                                                             | 333.604 (0,94)            |
| ABORDAGEM COGNITIVA COMPORTAMENTAL DO FUMANTE (POR ATENDIMENTO / PACIENTE)                        | 40.042 (0,11)             |
| ATIVIDADE EDUCATIVA / ORIENTAÇÃO EM GRUPO NA ATENÇÃO ESPECIALIZADA                                | 17.563 (0,05)             |
| ATIVIDADE EDUCATIVA PARA A POPULAÇÃO                                                              | 601 (0,00)                |
| <b>Other procedures</b>                                                                           |                           |
| <b>Non-dental procedures performed by Dentists or Non-treatment consultations</b>                 | <b>15.434.190 (16,91)</b> |
| PRIMEIRA CONSULTA ODONTOLOGICA PROGRAMÁTICA                                                       | 9.796.068 (63,47)         |
| CONSULTA DE PROFISSIONAIS DE NÍVEL SUPERIOR NA ATENÇÃO PRIMÁRIA (EXCETO MÉDICO)                   | 3.799.748 (24,62)         |
| RETIRADA DE PONTOS DE CIRURGIAS (POR PACIENTE)                                                    | 1.784.865 (11,56)         |
| AFERIÇÃO DE PRESSÃO ARTERIAL                                                                      | 40.083 (0,26)             |
| CONSULTA DE PROFISSIONAIS DE NIVEL SUPERIOR NA ATENÇÃO ESPECIALIZADA (EXCETO MÉDICO)              | 13.420 (0,09)             |
| EMISSION DE PARECER SOBRE NEXO CAUSAL                                                             | 6 (0,00)                  |
| <b>Urgencies</b>                                                                                  | <b>3.082.272 (3,38)</b>   |
| ATENDIMENTO DE URGÊNCIA EM ATENÇÃO BÁSICA                                                         | 3.075.129 (99,77)         |
| ATENDIMENTO DE URGENCIA EM ATENCAO ESPECIALIZADA                                                  | 6.592 (0,21)              |
| ATENDIMENTO DE URGENCIA C/ OBSERVACAO ATE 24 HORAS EM ATENCAO ESPECIALIZADA                       | 551 (0,02)                |
| <b>Home Visits</b>                                                                                | <b>1.663.780 (1,82)</b>   |
| CONSULTA/ATENDIMENTO DOMICILIAR                                                                   | 1.476.489 (88,74)         |
| VISITA DOMICILIAR/INSTITUCIONAL POR PROFISSIONAL DE NÍVEL SUPERIOR                                | 187.253 (11,25)           |
| BUSCA ATIVA                                                                                       | 34 (0,00)                 |
| ASSISTÊNCIA DOMICILIAR POR EQUIPE MULTIPROFISSIONAL.                                              | 2 (0,00)                  |
| VISITA DOMICILIAR POR PROFISSIONAL DE NÍVEL SUPERIOR                                              | 2 (0,00)                  |
| <b>Health Surveillance</b>                                                                        | <b>66 (0,00)</b>          |
| INSPEÇÃO DOS ESTABELECIMENTOS SUJEITOS À VIGILÂNCIA SANITÁRIA                                     | 39 (59,09)                |
| ATIVIDADES EDUCATIVAS SOBRE A TEMÁTICA DA DENGUE,REALIZADAS PARA A POPULAÇÃO                      | 15 (22,73)                |
| LICENCIAMENTO DOS ESTABELECIMENTOS SUJEITOS À VIGILÂNCIA SANITÁRIA                                | 4 (6,06)                  |
| ATENDIMENTO À DENÚNCIAS/RECLAMAÇÕES                                                               | 3 (4,55)                  |
| RECEBIMENTO DE DENÚNCIAS/RECLAMAÇÕES                                                              | 3 (4,55)                  |
| CADASTRO DE ESTABELECIMENTOS SUJEITOS À VIGILÂNCIA SANITÁRIA                                      | 1 (1,52)                  |
| EXCLUSÃO DE CADASTRO DE ESTABELECIMENTOS SUJEITOS À VIGILÂNCIA SANITÁRIA COM ATIVIDADES ENCERRADA | 1 (1,52)                  |
| <b>91.283.651 (100)</b>                                                                           |                           |
